# Supplementary material for: YB-1 Is a Novel Target for the Inhibition of α-Adrenergic-Induced Hypertrophy
Source: MDPI journal article supplement (doi:10.3390/ijms25010401), 2023-12-28
Supplement: s1 [file s1]

# Supplementary Material

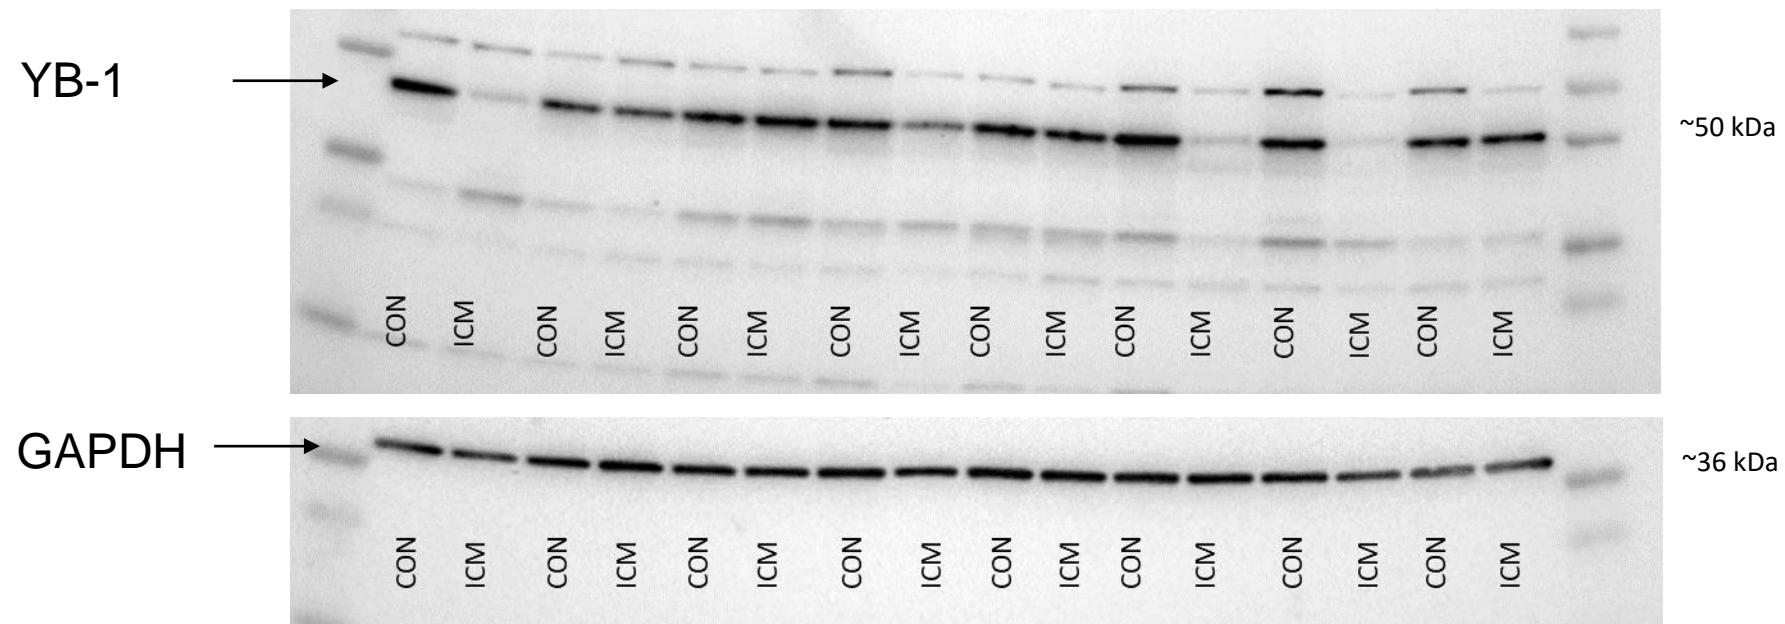

Figure S1: Complete blot with all human heart biopsy samples.

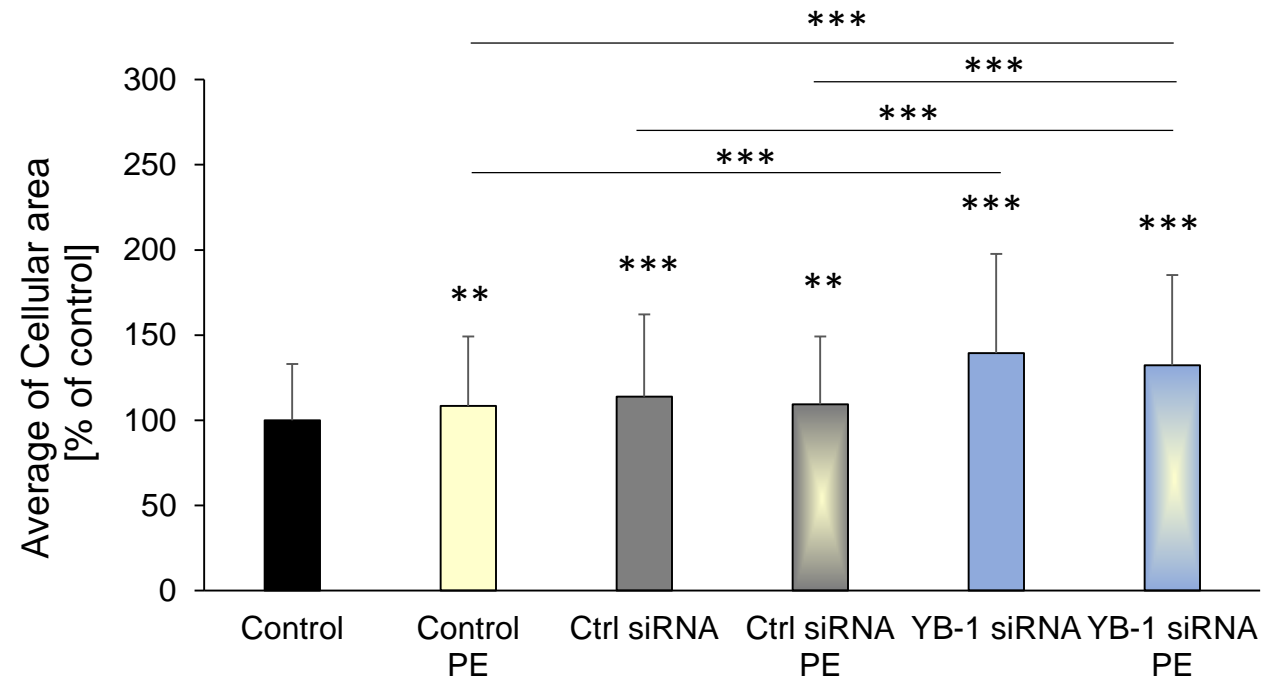

Figure S2: ***YB-1* downregulation in H9C2 cells leads to an increase in cell surface area.** Cardiomyocytes were transfected with *YB-1* siRNA or Ctrl siRNA or were non-transfected. Cells were photographed 48 hours after transfection with siRNA, preceded by 24 hours of PE (10  $\mu$ M) stimulation ( $n = 227 - 311$  cells, 18 dishes of three individual cell passages). Data are presented as the means  $\pm$  standard deviation. Key: \*\*,  $p < 0.01$ ; \*\*\*,  $p < 0.001$ .

| Transcript ID        | Gene symbol    | Gene name                                                             | Off-target score |
|----------------------|----------------|-----------------------------------------------------------------------|------------------|
| ENSRNOT00000007994.6 | Gdap1          | ganglioside-induced differentiation-associated-protein 1              | -7.569           |
| ENSRNOT00000086575.1 | Slc25a23       | solute carrier family 25 member 23                                    | -7.512           |
| ENSRNOT00000018988.4 | Paqr5          | progesterin and adipoQ receptor family member 5                       | -7.408           |
| ENSRNOT00000023354.7 | Mycbp          | Myc binding protein                                                   | -7.202           |
| ENSRNOT00000089319.2 | Lrrc75b        | leucine rich repeat containing 75B                                    | -7.19            |
| ENSRNOT00000080859.1 | Acot1          | acyl-CoA thioesterase 1                                               | -7.159           |
| ENSRNOT00000072580.3 | Ecscr          | endothelial cell surface expressed chemotaxis and apoptosis regulator | -7.13            |
| ENSRNOT00000079478.1 | AABR07006311.1 | LOC100910386 protein FAM111A-like                                     | -7.024           |
| ENSRNOT00000087595.1 | AABR07068316.1 | collagen type VI alpha 3 chain                                        | -6.972           |
| ENSRNOT00000026719.5 | AABR07068316.1 | collagen type VI alpha 3 chain                                        | -6.972           |

Table S1: **Predicted siRNA off-targets.**

Top ten potential off-target genes with the greatest absolute value of the off-target score.

| GO biological process                                                                | Fold Enrichment | FDR      |
|--------------------------------------------------------------------------------------|-----------------|----------|
| pericardium development (GO:0060039)                                                 | 2.92            | 4.41E-02 |
| artery morphogenesis (GO:0048844)                                                    | 2.15            | 9.53E-03 |
| morphogenesis of an epithelial sheet (GO:0002011)                                    | 2.12            | 3.65E-02 |
| intracellular receptor signaling pathway (GO:0030522)                                | 1.99            | 2.15E-03 |
| Rab protein signal transduction (GO:0032482)                                         | 1.97            | 4.97E-02 |
| mesoderm formation (GO:0001707)                                                      | 1.96            | 4.51E-02 |
| mesoderm morphogenesis (GO:0048332)                                                  | 1.95            | 4.18E-02 |
| cellular response to calcium ion (GO:0071277)                                        | 1.95            | 1.75E-02 |
| cardiac septum morphogenesis (GO:0060411)                                            | 1.94            | 2.77E-02 |
| cell cycle G1/S phase transition (GO:0044843)                                        | 1.93            | 4.82E-02 |
| interaction with host (GO:0051701)                                                   | 1.93            | 2.25E-02 |
| steroid hormone mediated signaling pathway (GO:0043401)                              | 1.90            | 1.45E-02 |
| regulation of cyclin-dependent protein serine/threonine kinase activity (GO:0000079) | 1.87            | 4.80E-02 |
| synapse assembly (GO:0007416)                                                        | 1.84            | 4.99E-02 |
| hair follicle development (GO:0001942)                                               | 1.84            | 4.24E-02 |

Table S2: **Gene Ontology (GO) enrichment analysis of predicted siRNA off-targets.**

Top 15 biological processes predicted to be affected by the changes in the expression pattern of the targeted genes.

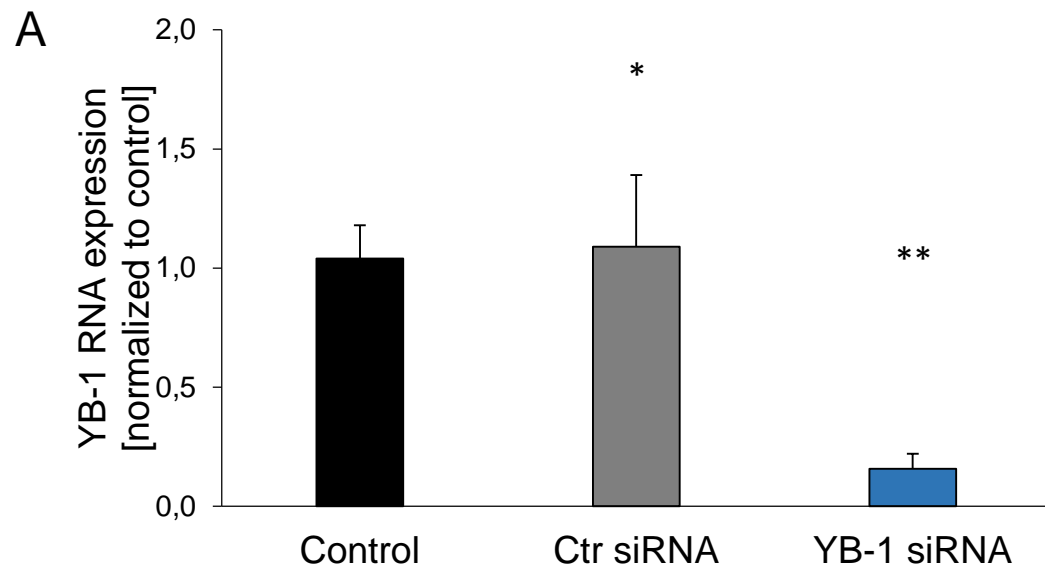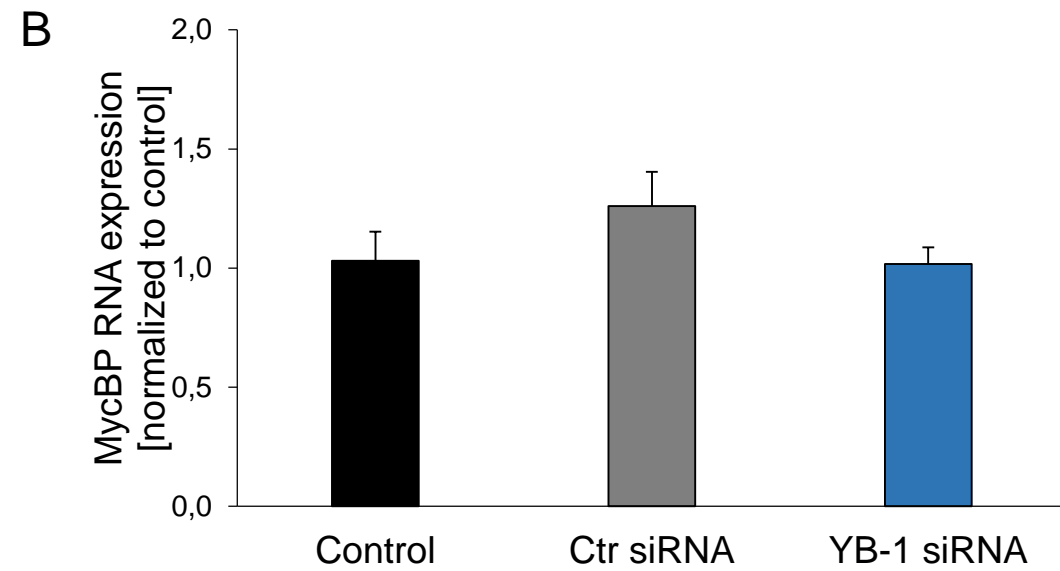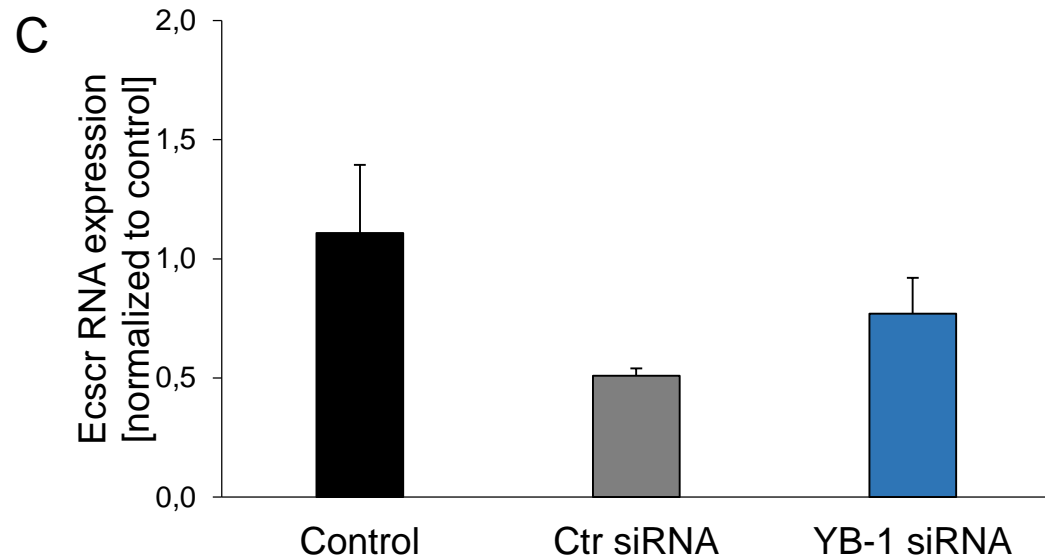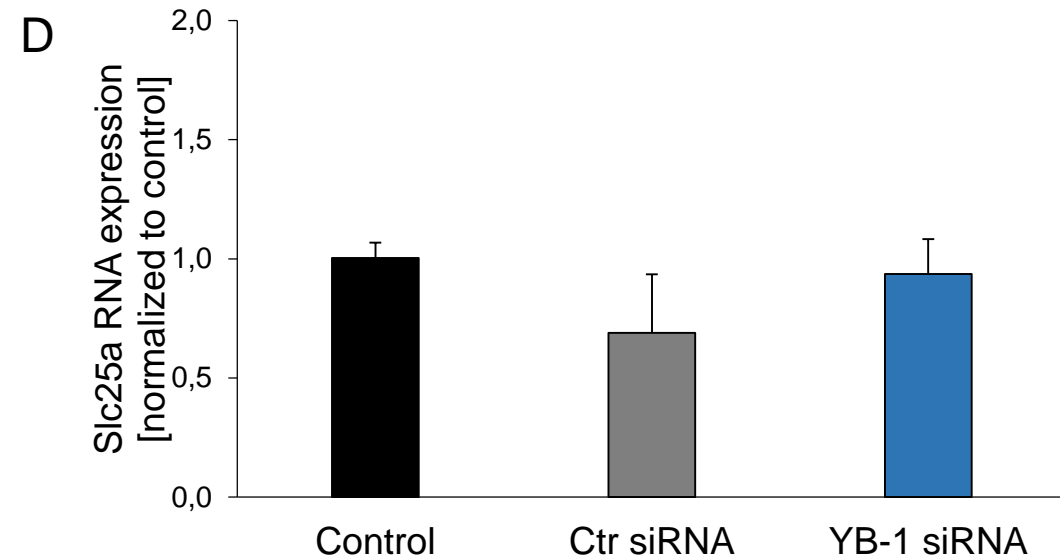

**Figure S3: *YB-1* downregulation in adult rat cardiomyocytes leads to no change in the expression of high-score off-target genes.** Cardiomyocytes were transfected with *YB-1* siRNA or Ctrl siRNA or were non-transfected. RNA expression was quantified after 48 hours ( $n = 3$ ) with real-time RT-PCR using *HPRT1* as the housekeeping gene. (A) *YB-1*, (B) MycBP (Myc binding protein) (C) *Ecsr* (endothelial cell surface expressed chemotaxis and apoptosis regulator) and (D) *Slc25a* (solute carrier family 25 member 23).
